# Supplementary material
Source: publisher figshare collection journal article supplement (https://acs.figshare.com/ndownloader/files/22476914)
Supplement: Supplementary file 1 [file 22476914]

## Supplementary information

### Vibronic quantum beating between electronic excited states in a heterodimer

V. M. Freixas<sup>a</sup>, S. Tretiak<sup>b</sup>, D. V. Makhov<sup>c,d</sup>, D. V. Shalashilin<sup>c</sup> and S. Fernandez-Alberti<sup>a</sup>.

<sup>a</sup>Departamento de Ciencia y Tecnologia, Universidad Nacional de Quilmes/CONICET, B1876BXD Bernal, Argentina.

<sup>b</sup>Theoretical Division, Center for Nonlinear Studies (CNLS), and Center for Integrated Nanotechnologies (CINT), Los Alamos National Laboratory, Los Alamos, NM 87545, USA.

<sup>c</sup>School of Chemistry, University of Leeds, Leeds LS2 9JT, UK.

<sup>d</sup>School of Mathematics, University of Bristol, Bristol BS8 1TW, UK

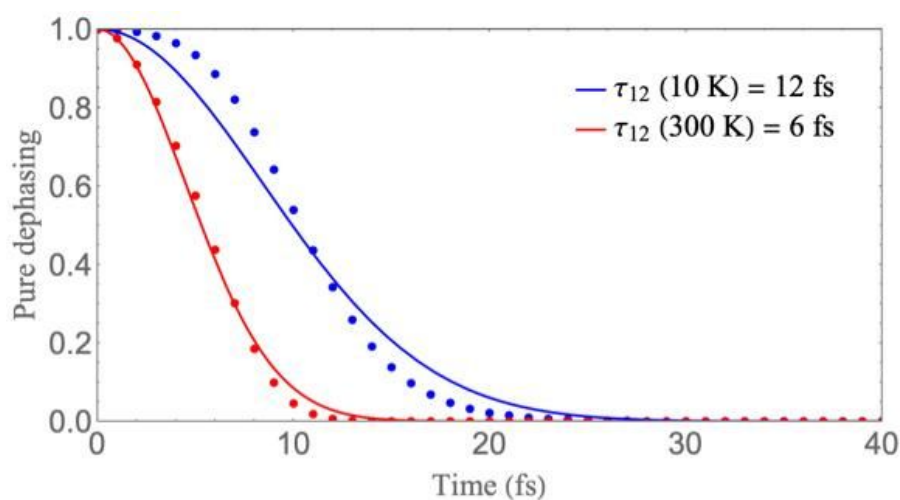

**Figure S1.** Pure dephasing function  $D_{12}(t)$  for the AB heterodimer evaluated from the EHR-NEXMD simulations.

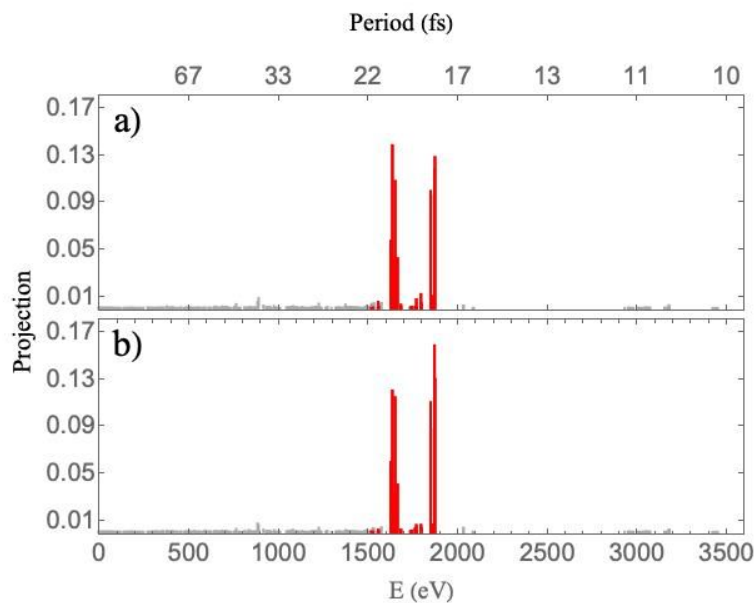

**Figure S2.** Distribution of values of the projection of the  $SVD_1$  vector on the basis of equilibrium normal modes.  $SVD_1$  vector was calculated using  $NACR_{12}$  vectors at  $t=20$ fs (maximum of  $NACT_{12}$  shown in **Figure 3(b)**) during EHR-NEXMD simulations at a) 10K and b) 300K. Modes within the range  $[1620;1890]$   $cm^{-1}$  are indicated in red.

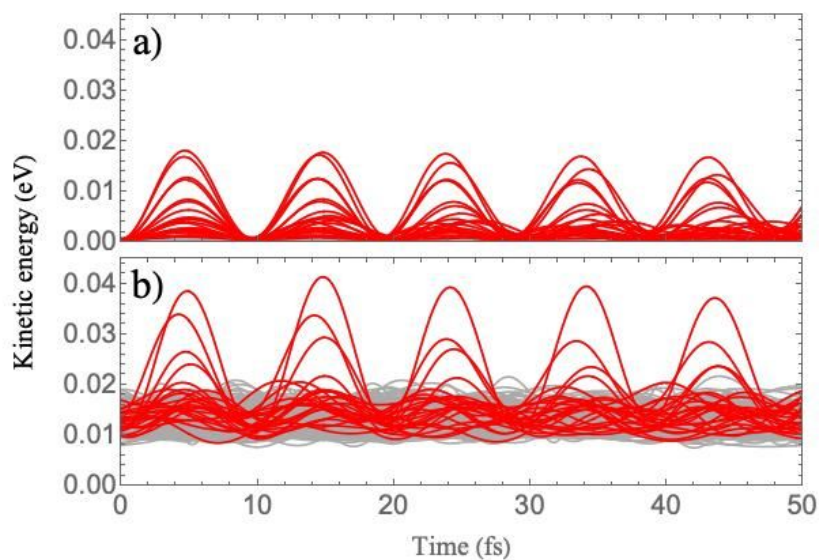

**Figure S3.** Time evolution of the average kinetic energy along equilibrium normal modes during EHR-NEXMD simulations at a) 10K and b) 300K. Modes within the range  $[1620;1890]$   $cm^{-1}$  are indicated in red.

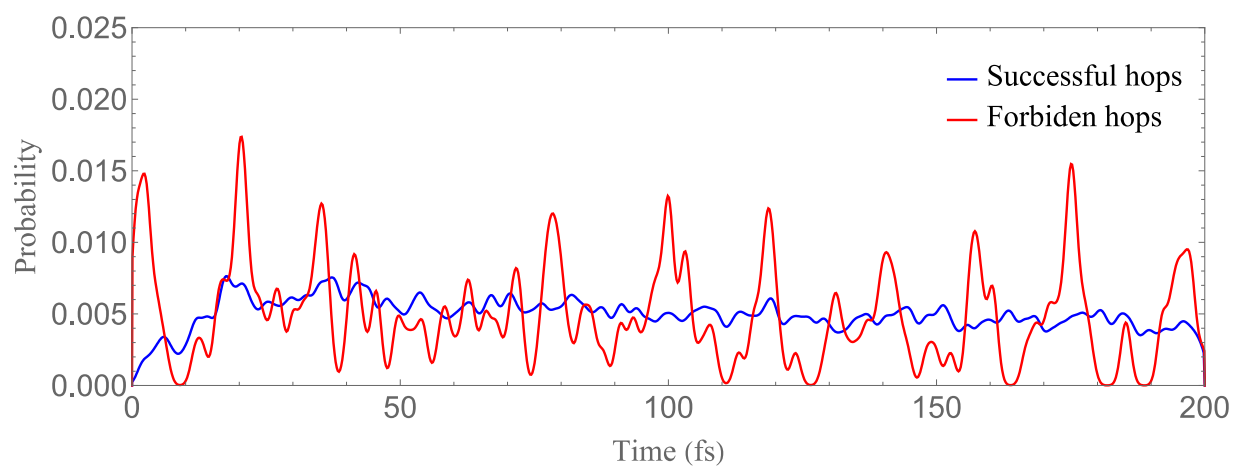

**Figure S4.** Probability density functions of successful and forbidden hops during SH-NEXMD simulations at 300 K.
